# Supplementary figures and images for: Autophagy delays apoptotic death in breast cancer cells following DNA damage
Source: Springer Nature journal article supplement (doi:10.1038/sj.cdd.4402039), 2006-09-22

**A**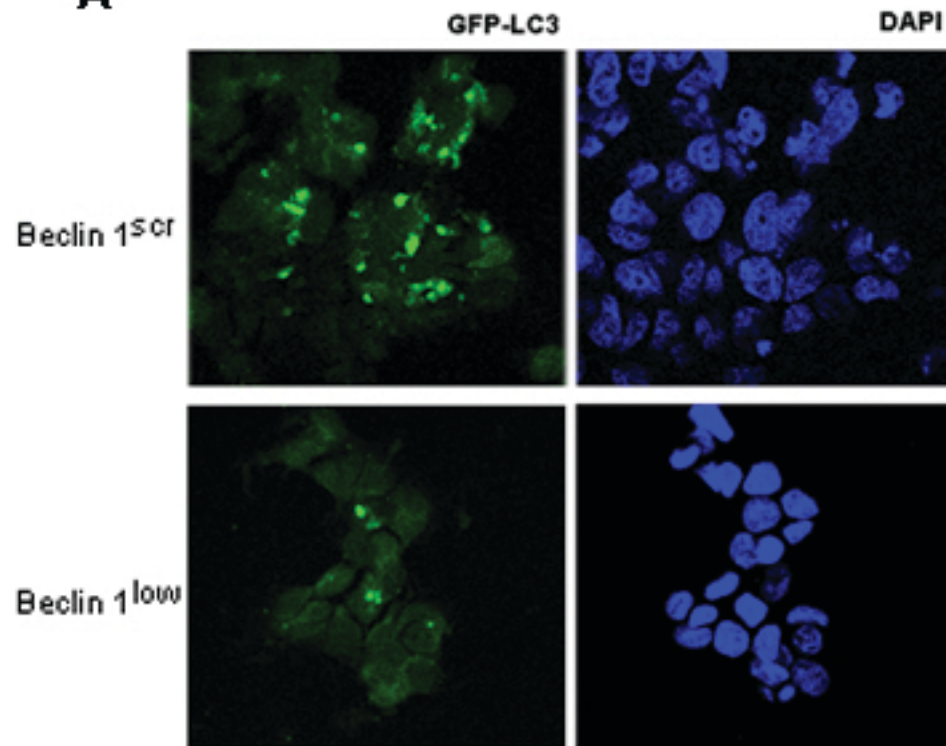**B**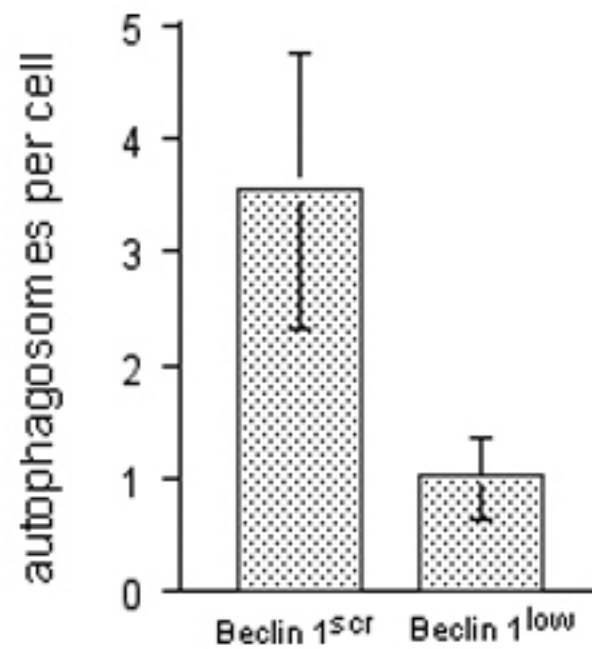

Supplement: 41418_2007_BF4402039_MOESM1_ESM.pdf [file 41418_2007_BF4402039_MOESM1_ESM.pdf]
